# Supplementary material for: Real-World Data Analysis of Healthcare Resource and Cost Utilization From Non-Alcoholic Fatty Liver Disease Patients in Japan
Source: Research Square preprint supplement (doi:10.21203/rs.3.rs-201639/v1), 2021-02-17
Supplement: Supplementary file 1 [file 6469a84d3fe610d213a57c11.docx]

***Supplementary Material***

**Table of contents**

| **Table S1.** | **ICD-10 and Standard Disease Code used for inclusion criteria** | **Page 2** |
| --- | --- | --- |
| **Table S2.** | **ICD-10 and Standard Disease Code used for exclusion criteria** | **Page 3-6** |
| **Table S3.** | **ICD-10 and Standard Disease Code used for comorbidities** | **Page 7-28** |
|  |  |  |
|  |  |  |
|  |  |  |

**Table S1. ICD-10 and Standard Disease Code used for inclusion criteria**

| **Diagnosis** | **ICD-10 Code** | **Standard Disease Code** | **Standard Disease Name** |
| --- | --- | --- | --- |
| **NAFLD/NASH** | K760 | 5718008 | hepatic steatosis |
| K758 | 8843497 | nonalcoholic steatohepatitis |
| **LC** | K746 | 5715012 | decompensated cirrhosis |
| 5715013 | portal cirrhosis |
| 5715025 | compensated cirrhosis |
| 8830442 | atrophic cirrhosis |
| 8830819 | nutritional cirrhosis |
| 8831512 | liver cirrhosis |
| 8834697 | nodular cirrhosis |
| 8846291 | autoimmune cirrhosis |
| **HCC** | C220 | 1550004 | liver cancer |
| 1550005 | hepatocellular carcinoma |
| 1550012 | primary liver cancer |
| 8847692 | hepatocellular carcinoma rupture |

Abbreviation: ICD-10, 10th revision of the International Statistical Classification of Diseases; NAFLD, Non-alcoholic fatty liver disease; NASH, nonalcoholic steatohepatitis; HCC, Hepatocellular Carcinoma; LC, Liver Cirrhosis

**Table S2. ICD-10 and Standard Disease Code used for exclusion criteria**

| **Diagnosis** | **ICD-10 Code** | **Standard Disease Code** | **Standard Disease Name** |
| --- | --- | --- | --- |
| **Hepatitis B** | B162 | 8830063 | fulminant hepatitis B |
| 8842151 | acute hepatitis B with hepatic coma |
| B169 | 703002 | hepatitis B |
| 703021 | acute hepatitis B |
| 8830062 | hepatitis B virus infection |
| 8830087 | hepatitis B virus nephropathy |
| 8848430 | hepatitis B viral arthritis |
| 8849810 | reactivation of hepatitis B virus |
| B181 | 703003 | chronic hepatitis B |
| 8843999 | cirrhosis type B |
| 8848181 | hepatitis B virus-related compensated cirrhosis |
| 8848182 | hepatitis B virus-related decompensated cirrhosis |
| **Hepatitis C** | B171 | 703024 | acute hepatitis C |
| 8830090 | hepatitis C virus nephropathy |
| B182 | 703022 | hepatitis C |
| 703025 | chronic hepatitis C |
| 8842154 | Hepatitis C virus infection |
| 8844002 | cirrhosis type C |
| 8848184 | hepatitis C virus-related compensated cirrhosis |
| 8848185 | hepatitis C virus-related decompensated cirrhosis |
| 8848433 | hepatitis C viral arthritis |
| **Other Viral Hepatitis** | B150 | 8842150 | acute hepatitis A with hepatic coma |
| 8846073 | fulminant hepatitis A |
| B159 | 701001 | hepatitis A |
| B172 | 703027 | hepatitis E |
| 8846075 | fulminant hepatitis E |
| B178 | 703026 | hepatitis D |
| B179 | 701005 | acute hepatitis |
| 8830173 | subacute hepatitis |
| 8832284 | acute viral hepatitis |
| 8835333 | postoperative acute hepatitis |
| B189 | 8840305 | chronic viral hepatitis |
| B190 | 5700002 | fulminant hepatitis |
| B199 | 703012 | post-transfusion hepatitis |
| 703014 | post-transfusion liver disorder |
| 8830743 | arthropathy due to viral hepatitis |
| 8830747 | viral hepatitis |
| B251 | 8833950 | cytomegalovirus hepatitis |
| B268 | 8840509 | mumps hepatitis |
| O984 | 8848013 | hepatitis B in pregnancy |
| 8848020 | hepatitis C in pregnancy |
| Z225 | 8830088 | HBV carrier |
| 8841292 | HCV carrier |
| 8841631 | HEV carrier |
| **HIV** | B200 | 8843639 | HIV nontuberculous mycobacteriosis |
| B202 | 8830096 | HIV Cytomegalovirus Infection |
| B203 | 8849060 | HIV herpesvirus infection |
| B204 | 8830094 | HIV candidiasis |
| B206 | 8830092 | HIV Carini Pneumonia |
| Z21 | 8830095 | HIV carrier |
| **Alcoholism and Alcoholic liver disease** | E244 | 8830336 | alcoholic pseudo Cushing's syndrome |
| F100 | 3050004 | acute alcoholism |
| 8849010 | alcoholic delirium |
| F101 | 3039002 | alcohol abuse |
| F102 | 8830330 | alcoholism |
| F103 | 8830357 | alcohol withdrawal state |
| F104 | 8849011 | alcohol withdrawal delirium |
| F105 | 2919003 | alcoholic psychosis |
| 8830331 | alcoholic hallucinosis |
| 8830355 | alcoholic paranoia |
| F106 | 2911002 | alcoholic Korsakoff syndrome |
| F107 | 2919005 | alcoholic brain syndrome |
| 8830345 | alcoholic mania |
| 8830798 | depression in alcoholism |
| 8840299 | chronic alcoholic brain syndrome |
| 8842547 | alcoholic dementia |
| G312 | 2919004 | alcoholic encephalopathy |
| 8830341 | alcoholic cerebellar ataxia |
| 8830351 | alcoholic cerebral degeneration |
| G621 | 8830347 | alcoholic polyneuropathy |
| G721 | 8841430 | alcoholic myopathy |
| I426 | 4255001 | alcoholic cardiomyopathy |
| K292 | 8830332 | alcoholic gastritis |
| K700 | 8830340 | alcoholic fatty liver |
| K701 | 5711001 | acute alcoholic hepatitis |
| 8830333 | alcoholic hepatitis |
| K702 | 8846239 | alcoholic hepatic fibrosis |
| K703 | 5712001 | alcoholic cirrhosis |
| 8846331 | decompensated alcoholic cirrhosis |
| 8846466 | esophageal varices associated with alcoholic cirrhosis |
| 8849244 | esophageal varices hemorrhage associated with alcoholic cirrhosis |
| K704 | 8830335 | alcoholic hepatic failure |
| 8832275 | acute alcoholic hepatic failure |
| 8840298 | chronic alcoholic hepatic failure |
| K709 | 5713001 | alcoholic liver disorder |
| 5713002 | chronic alcoholic liver disorder |
| 8830334 | alcoholic liver disease |
| K852 | 8846353 | alcoholic acute pancreatitis |
| K860 | 8830354 | alcohol-induced chronic pancreatitis |
| **Toxic Liver Disease** | K711 | 8832456 | acute drug-induced hepatic failure |
| 8846233 | drug-induced fulminant hepatitis |
| K712 | 8845885 | acute drug-induced hepatitis |
| K713 | 8846060 | chronic drug-induced hepatitis |
| K716 | 5733014 | drug-induced hepatitis |
| K717 | 8849218 | drug-induced cirrhosis |
| K719 | 5739010 | toxic liver disorder |
| 5739013 | drug-induced liver injury |
| K710 | 5758029 | intrahepatic cholestasis |
| 5768023 | intrahepatic obstructive jaundice |
| 8848353 | progressive familial intrahepatic cholestasis type 1 |
| 8848354 | progressive familial intrahepatic cholestasis type 2 |
| **Wilson's Disease** | E830 | 8830765 | Wilson's disease |
| **Autoimmune Hepatitis** | K754 | 5733008 | autoimmune hepatitis |
| 8848268 | severe autoimmune hepatitis |
| **Gaucher+LAL-D** | E752 | 2727004 | Gaucher's disease |
| E755 | 8830962 | xanthomatosis |
| 8846132 | cholesterol ester storage disease |
| E756 | 8840977 | lipidosis |
| **Biliary cirrhosis** | K743 | 8849023 | primary biliary cholangitis |
| 8849027 | symptomatic primary biliary cholangitis |
| 8849051 | asymptomatic primary biliary cholangitis |
| K744 | 5716003 | secondary biliary cirrhosis |
| 5716004 | obstructive cirrhosis |
| K745 | 5716002 | biliary cirrhosis |
| 8837113 | cholangiolitic liver cirrhosis |
| **Cholangitis** | K830 | 5751001 | cholangitis |
| 5761005 | acute suppurative cholangitis |
| 5761006 | acute cholangitis |
| 5761008 | primary sclerosing cholangitis |
| 5761015 | chronic cholangitis |
| 8831661 | intrahepatic cholangiolitis |
| 8832445 | acute obstructive suppurative cholangitis |
| 8832507 | stenosing cholangitis |
| 8832774 | retrograde cholangitis |
| 8833948 | cholangiolitis |
| 8833969 | recurrent cholangitis |
| 8835297 | duodenocholangitis |
| 8846292 | autoimmune cholangitis |
| 8848112 | IgG4-related sclerosing cholangitis |
| **Hemochromatosis** | E831 | 2750002 | hemochromatosis |
| 8831675 | liver hemochromatosis |
| 8833567 | hyperferremia |
| 8836845 | secondary hemochromatosis |
| 8837913 | iron metabolism disorder |
| 8839961 | hemochromatotic arthropathy |
| 8839971 | hemosiderosis |
| 8845615 | posttransfusional hyperferremia |
| 8848557 | neonatal hemochromatosis |
| 8848636 | idiopathic pulmonary hemosiderosis |

Abbreviation: ICD-10, 10th revision of the International Statistical Classification of Diseases; LAL-D, Lysosomal Acid Lipase Deficiency

**Table S3. ICD-10 and Standard Disease Code used for comorbidities**

| **Comorbidity** | **ICD-10 Code** | **Standard Disease Code** | **Standard Disease Name** |
| --- | --- | --- | --- |
| **Diabetes mellitus** | E10-E14 | 2500001 | insulin resistant diabetes |
| 2500013 | diabetes mellitus |
| 2500014 | type 1 diabetes mellitus |
| 2500015 | type 2 diabetes mellitus |
| 2500024 | pancreatic diabetes |
| 2500027 | brittle diabetes |
| 2500037 | malnutrition-related diabetes mellitus |
| 2500041 | insulin receptor disease |
| 2501002 | diabetic acidosis |
| 2501003 | diabetic acetonemia |
| 2501005 | diabetic ketoacidosis |
| 2502004 | hyperosmotic nonketotic coma |
| 2502006 | diabetic coma |
| 2503005 | diabetic nephropathy |
| 2503007 | diabetic renal insufficiency |
| 2504004 | diabetic iritis |
| 2504005 | diabetic central retinopathy |
| 2504006 | diabetic cataract |
| 2504010 | proliferative diabetic retinopathy |
| 2504012 | diabetic maculopathy |
| 2504013 | diabetic retinopathy |
| 2505011 | diabetic neuralgia |
| 2505018 | diabetic peripheral neuropathy |
| 2505021 | diabetic amyotrophy |
| 2506006 | diabetic gangrene |
| 2506011 | diabetic artery occlusion |
| 2507025 | diabetic arthropathy |
| 2507028 | diabetic complication |
| 2507029 | diabetic dermopathy |
| 2509003 | steroid diabetes |
| 2509004 | secondary diabetes |
| 8830028 | ketoacidosis in type 1 diabetes |
| 8830030 | coma in type 1 diabetes |
| 8830031 | type 1 diabetic nephropathy |
| 8830032 | neuropathy in type 1 diabetes |
| 8830033 | retinopathy in type 1 diabetes |
| 8830040 | ketoacidosis in type 2 diabetes |
| 8830041 | coma in type 2 diabetes |
| 8830042 | type 2 diabetic nephropathy |
| 8830043 | neuropathy in type 2 diabetes |
| 8830045 | retinopathy in type 2 diabetes |
| 8830405 | stable diabetes mellitus |
| 8830756 | viral diabetes |
| 8835244 | juvenile type 2 diabetes mellitus |
| 8838063 | diabetic ulcer |
| 8838064 | diabetic liver disorder |
| 8838065 | diabetic ophthalmoplegia |
| 8838066 | diabetic angiopathy |
| 8838067 | diabetic hypercholesterolemia |
| 8838068 | diabetic osteopathy |
| 8838069 | diabetic neurogenic bladder |
| 8838070 | diabetic autonomic neuropathy |
| 8838071 | diabetic nephrosclerosis |
| 8838072 | diabetic mental disorder |
| 8838073 | diabetic itching |
| 8838074 | diabetic polyneuropathy |
| 8838075 | diabetic mononeuropathy |
| 8838076 | diabetic hypoglycemic coma |
| 8838077 | diabetic arteriosclerosis |
| 8838078 | diabetic neuropathy |
| 8838079 | diabetic peripheral angiopathy |
| 8838080 | diabetic peripheral angiopathy |
| 8840710 | drug-induced diabetes mellitus |
| 8841679 | type 1 diabetes mellitus with coma |
| 8841680 | type 1 diabetes mellitus with ketoacidosis |
| 8841681 | type 1 diabetes mellitus with renal complications |
| 8841682 | type 1 diabetes mellitus with ophthalmic complications |
| 8841683 | type 1 diabetes mellitus with neurological complications |
| 8841684 | type 1 diabetes mellitus with peripheral circulatory complications |
| 8841685 | type 1 diabetes mellitus with arthropathy |
| 8841686 | type 1 diabetes mellitus with diabetic complications |
| 8841687 | type 1 diabetes mellitus with multiple diabetic complications |
| 8841688 | type 1 diabetes mellitus without diabetic complications |
| 8841689 | type 2 diabetes mellitus with coma |
| 8841690 | type 2 diabetes mellitus with ketoacidosis |
| 8841691 | type 2 diabetes mellitus with renal complications |
| 8841692 | type 2 diabetes mellitus with ophthalmic complications |
| 8841693 | type 2 diabetes mellitus with neurological complications |
| 8841694 | type 2 diabetes mellitus with peripheral circulatory complications |
| 8841695 | type 2 diabetes mellitus with arthropathy |
| 8841696 | type 2 diabetes mellitus with diabetic complications |
| 8841697 | type 2 diabetes mellitus with multiple diabetic complications |
| 8841698 | type 2 diabetes mellitus without diabetic complications |
| 8843106 | gangrene in type 2 diabetes |
| 8843127 | viral diabetes without diabetic complications |
| 8843378 | pancreatic diabetes with neurological complications |
| 8843379 | pancreatic diabetes with renal complications |
| 8843380 | pancreatic diabetes with multiple diabetic complications |
| 8843381 | pancreatic diabetes with diabetic complications |
| 8843382 | pancreatic diabetes without diabetic complications |
| 8843388 | steroid diabetes with ophthalmic complications |
| 8843392 | steroid diabetes with renal complications |
| 8843393 | steroid diabetes with multiple diabetic complications |
| 8843394 | steroid diabetes with diabetic complications |
| 8843395 | steroid diabetes without diabetic complications |
| 8843439 | diabetes mellitus without diabetic complications |
| 8843450 | secondary diabetes with coma |
| 8843451 | secondary diabetes with neurological complications |
| 8843452 | secondary diabetes with renal complications |
| 8843453 | secondary diabetes with multiple diabetic complications |
| 8843454 | secondary diabetes with diabetic complications |
| 8843455 | secondary diabetes without diabetic complications |
| 8843624 | drug-induced diabetes mellitus with multiple diabetic complications |
| 8843626 | drug-induced diabetes mellitus without diabetic complications |
| 8843983 | type 1 diabetic nephropathy stage 1 |
| 8843984 | type 1 diabetic nephropathy stage 2 |
| 8843985 | type 1 diabetic nephropathy stage 3 |
| 8843986 | type 1 diabetic nephropathy stage 3A |
| 8843988 | type 1 diabetic nephropathy stage 4 |
| 8843990 | type 2 diabetic macular edema |
| 8843991 | type 2 diabetic nephropathy stage 1 |
| 8843992 | type 2 diabetic nephropathy stage 2 |
| 8843993 | type 2 diabetic nephropathy stage 3 |
| 8843994 | type 2 diabetic nephropathy stage 3A |
| 8843995 | type 2 diabetic nephropathy stage 3B |
| 8843996 | type 2 diabetic nephropathy stage 4 |
| 8843997 | type 2 diabetic nephropathy stage 5 |
| 8844022 | slowly progressive type 1 diabetes mellitus |
| 8844024 | slowly progressive type 1 diabetes mellitus with ophthalmic complications |
| 8844025 | slowly progressive type 1 diabetes mellitus with ketoacidosis |
| 8844027 | slowly progressive type 1 diabetes mellitus with neurological complications |
| 8844028 | slowly progressive type 1 diabetes mellitus with renal complications |
| 8844029 | slowly progressive type 1 diabetes mellitus with multiple diabetic complications |
| 8844030 | slowly progressive type 1 diabetes mellitus without diabetic complications |
| 8844031 | slowly progressive type 1 diabetes mellitus with peripheral circulatory complications |
| 8844045 | fulminant type 1 diabetes mellitus |
| 8844089 | diabetic macular edema |
| 8844347 | cataract in type 2 diabetes |
| 8844536 | proliferative diabetic retinopathy - type 1 diabetes mellitus |
| 8844537 | proliferative diabetic retinopathy - type 2 diabetes mellitus |
| 8844628 | bullous in type 2 diabetes |
| 8844629 | scleroedema in type 2 diabetes |
| 8844652 | diabetic blister |
| 8844653 | diabetic scleroedema |
| 8845043 | type 1 diabetic maculopathy |
| 8845044 | acidosis in type 1 diabetes |
| 8845045 | acetonemia in type 1 diabetes |
| 8845051 | angiopathy in type 1 diabetes |
| 8845052 | hypercholesterolemia in type 1 diabetes |
| 8845056 | neuralgia in type 1 diabetes |
| 8845061 | itching in type 1 diabetes |
| 8845062 | polyneuropathy in type 1 diabetes |
| 8845063 | mononeuropathy in type 1 diabetes |
| 8845065 | hypoglycemic coma in type 1 diabetes |
| 8845068 | dermopathy in type 1 diabetes |
| 8845071 | peripheral neuropathy in type 1 diabetes |
| 8845072 | type 2 diabetic maculopathy |
| 8845073 | acidosis in type 2 diabetes |
| 8845074 | acetonemia in type 2 diabetes |
| 8845075 | ulcer in type 2 diabetes |
| 8845076 | liver disorder in type 2 diabetes |
| 8845077 | arthropathy in type 2 diabetes |
| 8845079 | amyotrophy in type 2 diabetes |
| 8845080 | angiopathy in type 2 diabetes |
| 8845081 | hypercholesterolemia in type 2 diabetes |
| 8845082 | iritis in type 2 diabetes |
| 8845083 | osteopathy in type 2 diabetes |
| 8845084 | neurogenic bladder in type 2 diabetes |
| 8845085 | neuralgia in type 2 diabetes |
| 8845086 | autonomic neuropathy in type 2 diabetes |
| 8845087 | nephrosclerosis in type 2 diabetes |
| 8845088 | renal failure in type 2 diabetes |
| 8845091 | polyneuropathy in type 2 diabetes |
| 8845092 | mononeuropathy in type 2 diabetes |
| 8845094 | hypoglycemic coma in type 2 diabetes |
| 8845095 | arteriosclerosis in type 2 diabetes |
| 8845096 | artery occlusion in type 2 diabetes |
| 8845097 | dermopathy in type 2 diabetes |
| 8845098 | peripheral angiopathy in type 2 diabetes |
| 8845099 | peripheral vascular disorder in type 2 diabetes |
| 8845100 | peripheral neuropathy in type 2 diabetes |
| 8845128 | hyperglycemic hyperosmolar syndrome |
| 8845198 | type B insulin receptor abnormality |
| 8845842 | gastroenteropathy in type 1 diabetes |
| 8848108 | gastroenteropathy in type 2 diabetes |
| 8848632 | diabetic foot gangrene |
| 8848633 | diabetic foot ulcer |
| 8848634 | diabetic foot |
| 8848768 | diabetic neuropathic pain |
| 8849056 | ketosis in type 1 diabetes |
| 8849058 | ketosis in type 2 diabetes |
| 8849181 | diabetic ketosis |
| 8849558 | hyperglycemic hyperosmolar syndrome in type 2 diabetes |
| 8849585 | hepatic diabetes mellitus |
| **T2DM** | E11 | 2500001 | insulin resistant diabetes |
| 2500015 | type 2 diabetes mellitus |
| 8830040 | ketoacidosis in type 2 diabetes |
| 8830041 | coma in type 2 diabetes |
| 8830042 | type 2 diabetic nephropathy |
| 8830043 | neuropathy in type 2 diabetes |
| 8830045 | retinopathy in type 2 diabetes |
| 8830405 | stable diabetes mellitus |
| 8835244 | juvenile type 2 diabetes mellitus |
| 8841689 | type 2 diabetes mellitus with coma |
| 8841690 | type 2 diabetes mellitus with ketoacidosis |
| 8841691 | type 2 diabetes mellitus with renal complications |
| 8841692 | type 2 diabetes mellitus with ophthalmic complications |
| 8841693 | type 2 diabetes mellitus with neurological complications |
| 8841694 | type 2 diabetes mellitus with peripheral circulatory complications |
| 8841695 | type 2 diabetes mellitus with arthropathy |
| 8841696 | type 2 diabetes mellitus with diabetic complications |
| 8841697 | type 2 diabetes mellitus with multiple diabetic complications |
| 8841698 | type 2 diabetes mellitus without diabetic complications |
| 8843106 | gangrene in type 2 diabetes |
| 8843990 | type 2 diabetic macular edema |
| 8843991 | type 2 diabetic nephropathy stage 1 |
| 8843992 | type 2 diabetic nephropathy stage 2 |
| 8843993 | type 2 diabetic nephropathy stage 3 |
| 8843994 | type 2 diabetic nephropathy stage 3A |
| 8843995 | type 2 diabetic nephropathy stage 3B |
| 8843996 | type 2 diabetic nephropathy stage 4 |
| 8843997 | type 2 diabetic nephropathy stage 5 |
| 8844347 | cataract in type 2 diabetes |
| 8844537 | proliferative diabetic retinopathy - type 2 diabetes mellitus |
| 8844628 | bullous in type 2 diabetes |
| 8844629 | scleroedema in type 2 diabetes |
| 8845072 | type 2 diabetic maculopathy |
| 8845073 | acidosis in type 2 diabetes |
| 8845074 | acetonemia in type 2 diabetes |
| 8845075 | ulcer in type 2 diabetes |
| 8845076 | liver disorder in type 2 diabetes |
| 8845077 | arthropathy in type 2 diabetes |
| 8845079 | amyotrophy in type 2 diabetes |
| 8845080 | angiopathy in type 2 diabetes |
| 8845081 | hypercholesterolemia in type 2 diabetes |
| 8845082 | iritis in type 2 diabetes |
| 8845083 | osteopathy in type 2 diabetes |
| 8845084 | neurogenic bladder in type 2 diabetes |
| 8845085 | neuralgia in type 2 diabetes |
| 8845086 | autonomic neuropathy in type 2 diabetes |
| 8845087 | nephrosclerosis in type 2 diabetes |
| 8845088 | renal failure in type 2 diabetes |
| 8845091 | polyneuropathy in type 2 diabetes |
| 8845092 | mononeuropathy in type 2 diabetes |
| 8845094 | hypoglycemic coma in type 2 diabetes |
| 8845095 | arteriosclerosis in type 2 diabetes |
| 8845096 | artery occlusion in type 2 diabetes |
| 8845097 | dermopathy in type 2 diabetes |
| 8845098 | peripheral angiopathy in type 2 diabetes |
| 8845099 | peripheral vascular disorder in type 2 diabetes |
| 8845100 | peripheral neuropathy in type 2 diabetes |
| 8848108 | gastroenteropathy in type 2 diabetes |
| 8849058 | ketosis in type 2 diabetes |
| 8849558 | hyperglycemic hyperosmolar syndrome in type 2 diabetes |
| **Hypertension** | I10-I15 | 4019016 | juvenile hypertension |
| 4019017 | juvenile borderline hypertension |
| 4029010 | hypertensive heart disease |
| 4039001 | malignant nephrosclerosis |
| 4039005 | hypertensive renal disease |
| 4039006 | hypertensive nephropathy |
| 4039025 | arteriosclerotic kidney |
| 4039028 | arteriosclerotic nephrosclerosis |
| 4039033 | hypertensive nephrosclerosis |
| 5879003 | benign nephrosclerosis |
| 8830212 | malignant hypertension |
| 8832479 | borderline hypertension |
| 8833421 | hypertension |
| 8833422 | hypertensive congestive heart failure |
| 8833425 | hypertensive heart and renal disease |
| 8833426 | hypertensive cardiac failure |
| 8833427 | hypertensive renal failure |
| 8835586 | renovascular hypertension |
| 8835605 | renal parenchymal hypertension |
| 8835614 | renal hypertension |
| 8838336 | endocrine hypertension |
| 8838398 | secondary hypertension |
| 8839689 | adrenal hypertension |
| 8840107 | essential hypertension |
| 8842089 | high renin hypertension |
| 8842094 | low renin hypertension |
| 8842178 | hypertensive crisis |
| 8842488 | hypertensive urgency |
| 8842500 | systolic hypertension |
| 8848337 | hyperuricemia associated with hypertension |
| 8849279 | pseudoaldosteronism |
| 8849300 | hypertensive headache |
| 8849491 | Liddle syndrome |
| **Hyperlipidemia** | E78 | 2720001 | familial hypercholesterolemia |
| 2720004 | hypercholesterolemia |
| 2721002 | hypertriglyceridemia |
| 2723001 | hyperchylomicronemia |
| 2724007 | hyperlipidemia |
| 2724012 | primary hyperlipidemia |
| 2724023 | prandial hyperlipemia |
| 2724031 | secondary hyperlipidemia |
| 2724036 | LDL level elevation |
| 2724037 | HDL level elevation |
| 2729002 | lipid metabolism disorder |
| 2729003 | inborn error of lipid metabolism |
| 3335006 | chorea-acanthocytosis |
| 8831264 | familial LCAT deficiency |
| 8831269 | familial hypertriglyceridemia |
| 8831270 | familial hyperlipoproteinemia type 1 |
| 8831271 | familial hyperlipoproteinemia type 2a |
| 8831272 | familial hyperlipoproteinemia type 2b |
| 8831273 | familial hyperlipoproteinemia type 3 |
| 8831274 | familial hyperlipoproteinemia type 4 |
| 8831275 | familial hyperlipoproteinemia type 5 |
| 8831286 | familial combined hyperlipidemia |
| 8833120 | nodular xanthoma |
| 8833435 | hypercholesterolemic xanthoma |
| 8833663 | high-density lipoprotein deficiency |
| 8833881 | mixed hyperlipidemia |
| 8837884 | hypobetalipoproteinemia |
| 8840108 | essential hypercholesterolemia |
| 8840506 | abetalipoproteinemia |
| 8840985 | lipoprotein deficiency |
| 8842204 | hypolipidemia |
| 8844446 | dyslipidemia |
| 8845523 | familial hypercholesterolemia - heterozygote |
| 8845524 | familial hypercholesterolemia - homozygote |
| 8849528 | primary hyperchylomicronemia |
| **CVD** | I20-I25 | 4100008 | coronary artery dissection |
| 4109038 | cardiac rupture |
| 4119015 | post myocardial infarction syndrome |
| 4139004 | variant angina |
| 4139007 | angina pectoris |
| 4139026 | unstable angina |
| 4139028 | nocturnal angina |
| 4140008 | coronary arteriosclerosis |
| 4140013 | coronary arteriosclerotic heart disease |
| 4140014 | coronary artery disease |
| 4140020 | arteriosclerotic coronary insufficiency |
| 4141001 | coronary aneurysm |
| 4141003 | coronary arteriovenous fistula |
| 4141004 | ventricular aneurysm |
| 4148001 | myocardial ischemia |
| 4149007 | ischemic heart disease |
| 8830403 | angina at rest |
| 8831572 | coronary atherosclerosis |
| 8831574 | coronary stenosis |
| 8831575 | coronary thrombosis |
| 8831576 | coronary artery thromboembolism |
| 8831577 | coronary artery heart disease |
| 8831578 | coronary artery embolism |
| 8831579 | coronary artery incomplete |
| 8831580 | coronary artery occlusion |
| 8832297 | acute inferior posterior myocardial infarction |
| 8832298 | acute inferolateral myocardial infarction |
| 8832310 | acute inferior myocardial infarction |
| 8832316 | acute transmural myocardial infarction |
| 8832326 | acute basal-lateral myocardial infarction |
| 8832330 | acute ischemic heart disease |
| 8832338 | acute high lateral myocardial infarction |
| 8832347 | acute posterior myocardial infarction |
| 8832348 | acute posteroseptal myocardial infarction |
| 8832356 | acute posterobasal myocardial infarction |
| 8832357 | acute posterolateral myocardial infarction |
| 8832376 | acute myocardial infarction |
| 8832377 | ruptured chordae tendineae following acute myocardial infarction |
| 8832378 | ventricular septal perforation following acute myocardial infarction |
| 8832379 | intraventricular thrombosis following acute myocardial infarction |
| 8832383 | hemopericardium following acute myocardial infarction |
| 8832384 | papillary muscle rupture after acute myocardial infarction |
| 8832389 | acute subendocardial myocardial infarction |
| 8832400 | acute anterolateral myocardial infarction |
| 8832401 | acute anterior myocardial infarction |
| 8832402 | acute anterior apical myocardial infarction |
| 8832403 | acute anteroseptal myocardial infarction |
| 8832404 | acute lateral myocardial infarction |
| 8832409 | acute septal myocardial infarction |
| 8832678 | ischemic cardiomyopathy |
| 8833963 | subsequent myocardial infarction |
| 8834877 | de novo effort angina |
| 8834919 | myocardial infarction |
| 8836816 | worsening effort angina |
| 8837801 | old inferior myocardial infarction |
| 8837804 | old posterior myocardial infarction |
| 8837807 | old myocardial infarction |
| 8837809 | old anteroseptal myocardial infarction |
| 8837810 | old lateral myocardial infarction |
| 8841211 | effort and rest angina |
| 8841212 | exercise angina |
| 8842211 | silent myocardial ischemia |
| 8842490 | left ventricular free wall rupture |
| 8842760 | interventricular septum aneurysm |
| 8843284 | acute right ventricular infarction |
| 8844146 | coronal rupture of aneurysm |
| 8844586 | microvascular angina |
| 8845119 | coronary spastic angina |
| 8845239 | coronary artery calcification |
| 8846370 | coronary artery dilatation |
| 8846372 | acute coronary syndrome |
| 8846988 | ST elevation type acute myocardial infarction |
| 8847004 | acute extensive anterior myocardial infarction |
| 8847005 | angina and triple vessel disease |
| 8847059 | non-Q wave myocardial infarction |
| 8847060 | non-ST-elevation myocardial infarction |
| 8847530 | old anterior myocardial infarction |
| 8847838 | stable angina |
| 8848709 | postinfarction angina |
| 8849595 | chronic total occlusion |
| I110 | 8833422 | hypertensive congestive heart failure |
| 8833426 | hypertensive cardiac failure |
| I50 | 4280002 | cardiac edema |
| 4280005 | chronic congestive heart failure |
| 4280011 | right heart failure |
| 4281005 | cardiac asthma |
| 4281009 | insufficiency of left heart |
| 4281010 | cardiac dyspnea |
| 4289005 | acute cardiac failure |
| 4289015 | cardiac failure |
| 4289018 | chronic cardiac failure |
| 5140016 | cardiogenic pulmonary edema |
| 8830796 | congestive heart failure |
| 8834931 | myocardial failure |
| 8841016 | bi-ventricular failure |
| J81 | 5140012 | pulmonary edema |
| 5140017 | non-cardiogenic pulmonary edema |
| 8832422 | acute pulmonary edema |
| 8844721 | reexpansion pulmonary edema |
| **Renal impairment** | I12 | 8833427 | hypertensive renal failure |
| 4039001 | malignant nephrosclerosis |
| 4039005 | hypertensive renal disease |
| 4039006 | hypertensive nephropathy |
| 4039025 | arteriosclerotic kidney |
| 4039028 | arteriosclerotic nephrosclerosis |
| 4039033 | hypertensive nephrosclerosis |
| 5879003 | benign nephrosclerosis |
| N00 | 8832362 | acute glomerulonephritis |
| 8848419 | poststreptococcal acute glomerulonephritis |
| N01 | 8832474 | rapid progressive diffuse membranous glomerulonephritis |
| 8832472 | rapidly progressive diffuse endocapillary proliferative glomerulonephritis |
| 8832473 | rapid progressive disseminated crescentic glomerulonephritis |
| 8848109 | ANCA-associated nephritis |
| 8848401 | idiopathic crescentic glomerulonephritis |
| 8848508 | anti-glomerular basement membrane nephritis |
| 8832470 | rapidly progressive glomerulonephritis |
| N02 | 5831001 | IgA nephropathy |
| 5997004 | persistent hematuria |
| 5997005 | renal hematuria |
| 5997012 | recurrent hematuria |
| 5997016 | benign recurrent hematuria |
| 8833171 | hematuria syndrome |
| 8834239 | glomerular hematuria |
| 8841019 | benign familial hematuria |
| 8841023 | benign hematuria |
| N03 | 8832919 | mild chronic nephritic syndrome |
| 8840393 | chronic diffuse membranous glomerulonephritis |
| 8840394 | chronic diffuse mesangial proliferative glomerulonephritis |
| 8840391 | chronic diffuse endocapillary proliferative glomerulonephritis |
| 8840392 | chronic diffuse crescentic glomerulonephritis |
| 5829003 | chronic glomerulonephritis |
| 5829008 | chronic nephritic syndrome |
| N04 | 8839471 | minimal change nephrotic syndrome |
| 8839551 | diffuse membranous glomerulonephritis nephrotic syndrome |
| 5819004 | nephrotic syndrome |
| 8834799 | infantile nephrotic syndrome |
| 8835738 | steroid resistance nephrotic syndrome |
| 8836335 | congenital nephrotic syndrome |
| 8838367 | refractory nephrotic syndrome |
| 8838401 | secondary nephrotic syndrome |
| 8839430 | frequently relapsing nephrotic syndrome |
| 8848070 | steroid-dependent nephrotic syndrome |
| 8849711 | primary nephrotic syndrome |
| N05 | 8848410 | minimal glomerular change |
| 4039038 | focal glomerulosclerosis |
| 8836667 | focal glomerulonephritis |
| 5831004 | membranous nephropathy |
| 8840538 | mesangial proliferative glomerulonephritis |
| 8831660 | endocapillary proliferative glomerulonephritis |
| 8840229 | membranoproliferative glomerulonephritis |
| 8838994 | crescentic glomerulonephritis |
| 8836820 | proliferative glomerulonephritis |
| 5839007 | glomerulonephritis |
| 5839010 | nephritis |
| N06 | 8834240 | glomerular albuminuria |
| N07 | 7533005 | familial nephritis |
| N10 | 5901002 | acute pyelonephritis |
| 8832416 | acute tubulointerstitial nephritis |
| 8845884 | acute focal bacterial nephritis |
| 8846554 | emphysematous pyelonephritis |
| 8846804 | uncomplicated pyelonephritis |
| N11 | 8832771 | reflux nephropathy |
| 8840398 | chronic obstructive pyelonephritis |
| 8839400 | nonobstructive chronic pyelonephritis |
| 5900001 | chronic pyelonephritis |
| 8840381 | chronic tubulointerstitial nephritis |
| 8840395 | chronic complicated pyelonephritis |
| 8848114 | IgG4-related kidney disease |
| N12 | 5901005 | postoperative pyelonephritis |
| 5908007 | pyelonephritis |
| 5908015 | ascending pyelonephritis |
| 8838516 | tubulointerstitial nephritis |
| 8844117 | BK virus nephropathy |
| N13 | 8844574 | hydronephrosis with ureteropelvic junction obstruction |
| 8849108 | hydronephrosis with acquired pyeloureteral junction stenosis |
| 8844575 | hydronephrosis with ureteral stricture |
| 8844494 | hydronephrosis with renal calculous obstruction |
| 8844573 | hydronephrosis with ureteral calculous obstruction |
| 5910008 | bilateral hydronephrosis |
| 5919001 | atrophic hydronephrosis |
| 5919003 | acquired hydronephrosis |
| 5919005 | hydronephrosis |
| 8845334 | pyelectasis |
| 8846725 | hydroureteronephrosis |
| 8846985 | bilateral hydroureteronephrosis |
| 8835703 | hydroureter |
| 5933005 | ureterostenosis |
| 5933007 | ureteral obstruction |
| 5934005 | retroperitoneal fibrosis |
| 8838724 | pyonephrosis |
| 5937004 | vesicoureteral reflux |
| 8843736 | extrarenal extravasation |
| 5996003 | urinary tract obstruction |
| N14 | 8842108 | NSAIDs nephropathy |
| 8847520 | contrast nephropathy |
| 8840719 | drug-induced renal disease |
| 9952036 | drug-induced renal disease |
| N15 | 5902002 | perinephric abscess |
| 5902005 | renal abscess |
| 5909001 | renal infection |
| N17 | 5845001 | acute tubular necrosis |
| 5849005 | acute parenchymal renal failure |
| 8834876 | shock kidney |
| 5849004 | acute prerenal failure |
| 5849006 | acute postrenal failure |
| 5849003 | acute renal failure |
| N18 | 8847577 | chronic kidney disease stage G1 |
| 8847578 | chronic kidney disease stage G2 |
| 8847579 | chronic kidney disease stage G3 |
| 8847580 | chronic kidney disease stage G3a |
| 8847581 | chronic kidney disease stage G3b |
| 8847582 | chronic kidney disease stage G4 |
| 3621014 | renal retinopathy |
| 5869015 | uremic pericarditis |
| 5869016 | uremic lung |
| 8838555 | uremic neuropathy |
| 8841385 | uremic encephalopathy |
| 8842116 | end-stage renal failure |
| 8847583 | chronic kidney disease stage G5 |
| 8848103 | chronic kidney disease stage G5D |
| 5859002 | chronic renal failure |
| 8844106 | chronic kidney disease |
| N19 | 2858001 | renal anemia |
| 5859001 | uremia |
| 5939017 | nonfunctioning kidney |
| 8835642 | renal failure |
| N20 | 5920003 | spontaneous expulsion of kidney stones |
| 5920004 | sandy kidney stones |
| 8834072 | staghorn calculus |
| 8835579 | renal pelvic calculus |
| 8835588 | nephrolithiasis |
| 8837043 | multiple kidney stone |
| 8838506 | ureterolithiasis |
| 8835637 | kidney ureter stone |
| N25 | 5880002 | renal osteodystrophy |
| 8841309 | phosphate-losing tubular disorder |
| 5881001 | nephrogenic diabetes insipidus |
| 2762015 | tubular acidosis |
| 8830899 | distal renal tubular acidosis |
| 8832721 | proximal renal tubular acidosis |
| 8844495 | secondary hyperparathyroidism of renal origin |
| 8847502 | prolonged hyperparathyroidism |
| 8832417 | acute renal tubular defect |
| N26 | 4039015 | nephrosclerosis |
| 5870001 | contracted kidney |
| N28 | 5938006 | renal infarction |
| 8835585 | renal ischemia |
| 8835629 | renal artery thrombosis |
| 8835631 | renal artery embolism |
| 8835633 | renal artery occlusion |
| 8833579 | acquired cystic disease |
| 8833863 | solitary renal cyst |
| 8835638 | renal cyst |
| 8837129 | simple renal cyst |
| 8845496 | parapelvic cyst |
| 8847521 | polycystic contracted kidney |
| 2232001 | ureteral polyp |
| 5930002 | floating kidney |
| 5931001 | renal swelling |
| 5933008 | ureterocele |
| 5938015 | calyceal diverticulum |
| 5938021 | idiopathic renal bleeding |
| 5938025 | ureteral fistula |
| 5938028 | renal bleeding |
| 5939009 | renal mass |
| 5978014 | ureteritis |
| 7532013 | ureteral dilatation |
| 7533013 | renal malposition |
| 8832706 | megaureter |
| 8835582 | nephroptosis |
| 8835604 | perirenal hemorrhage |
| 8835645 | renal fistula |
| 8838504 | ureteral infection |
| 8838509 | periureteral abscess |
| 8838513 | ureteral cutaneous fistula |
| 8842120 | nephrocalcinosis |
| 8849597 | acute renal disorder |
| 5839017 | renal disorder |
| 5933006 | ureteral passage disturbance |
| 8835584 | renal dysfunction |
| 8848361 | kidney disease |
| **Abdominal pain** | R100 | 7890005 | acute abdomen |
| R101 | 7865013 | epigastric pain |
| 7890008 | upper abdominal pain |
| 8830562 | stomachache |
| 8832373 | acute dyspepsia |
| 8834689 | indigestion |
| 8834690 | dyspeptic diarrhea |
| 8842811 | dyspepsia |
| R103 | 5439008 | appendicular colic |
| 7890003 | ileocecal pain |
| 7890021 | subumbilical pain |
| 7890022 | periumbilical pain |
| 8831434 | lower abdominal pain |
| 8836793 | groin pain |
| 8837750 | intestinal colic |
| R104 | 7890011 | flank pain |
| 7890014 | recurrent abdominal pain |
| 7890017 | abdominal tenderness |
| 7890020 | abdominal wall pain |
| 7890027 | cyclic abdominal pain |
| 7890029 | colic |
| 8835224 | persistent abdominal pain |
| 8839710 | abdominal pain |
| **Anemia** | D460 | 8847423 | refractory thrombocytopenia |
| D462 | 8847313 | refractory anemia with an excess of blasts |
| 8847314 | refractory anemia with excess blasts-1 |
| 8847315 | refractory anemia with excess blasts-2 |
| D464 | 2850003 | refractory anemia |
| D465 | 8847392 | refractory cytopenia with multilineage dysplasia |
| D500 | 2809005 | hemorrhagic anemia |
| D501 | 8842989 | Plummer-Vinson syndrome |
| D508 | 2859002 | microcytic anemia |
| 8834694 | microcytic hypochromic anemia |
| D509 | 2809009 | iron-deficiency anemia |
| 2859008 | hypochromic anemia |
| D510 | 2810003 | pernicious anemia |
| 8839020 | Hunter's glossitis |
| D511 | 8830568 | hereditary megaloblastic anemia |
| 8843649 | Imerslund-Grasbeck syndrome |
| D513 | 8833943 | vegetarian anemia |
| D518 | 8830479 | postgastrectomy megaloblastic anemia |
| 8832264 | vitamin B12 deficiency anemia due to malabsorption syndrome |
| 8832851 | vitamin B12 deficiency anemia due to Crohn's disease |
| 8834764 | vitamin B12 deficiency anemia due to small bowel resection |
| D519 | 8839495 | vitamin B12 deficiency anemia |
| D520 | 8830820 | nutritional megaloblastic anemia |
| 8834844 | dietary folic acid deficiency anemia |
| D521 | 8840711 | drug-induced folic acid deficiency anaemia |
| D528 | 8840784 | folic acid deficiency associated with hemolytic anemia |
| D529 | 2859001 | hyperchromic anemia |
| 2859005 | macrocytic anemia |
| 8840787 | folic acid deficiency anemia |
| D530 | 8830298 | amino acid deficiency anemia |
| 8837197 | protein deficiency anemia |
| D531 | 2819003 | megaloblastic anemia |
| D532 | 8831022 | scorbutic anemia |
| D538 | 8838247 | copper deficiency anemia |
| 8839563 | micronutrient deficiency anemia |
| 8849241 | zinc deficiency anemia |
| D539 | 2809012 | nutritional anemia |
| 2811003 | avitaminotic anemia |
| 2819001 | postgastrectomy anemia |
| 2859012 | chronic anemia |
| 8836037 | erythrocyte enzyme deficiency anemia |
| D561 | 8837559 | thalassemia intermedia |
| 8840024 | beta-thalassemia |
| D569 | 8834025 | thalassemia |
| D580 | 2820001 | hereditary spherocytosis |
| D582 | 2859018 | hemoglobinopathy |
| 8839599 | unstable hemoglobinopathy |
| D589 | 8831289 | familial hemolytic anemia |
| D590 | 8840707 | drug-induced autoimmune hemolytic anemia |
| D591 | 2830003 | autoimmune hemolytic anemia |
| 2830009 | cold agglutinin disease |
| 8831012 | warm autoimmune hemolytic anemia |
| D592 | 2831004 | drug-induced hemolytic anemia |
| D593 | 2831002 | hemolytic uremic syndrome |
| D594 | 8832145 | mechanical hemolytic anemia |
| 8835366 | postoperative hemolytic anemia |
| 8839277 | non-autoimmune hemolytic anemia |
| 8839468 | microangiopathic hemolytic anemia |
| D595 | 8840095 | paroxysmal nocturnal hemoglobinuria |
| D596 | 8831680 | cold hemoglobinuria |
| 8833418 | march hemoglobinuria |
| 8840090 | paroxysmal cold hemoglobinuria |
| D599 | 2839007 | hemolytic anemia |
| 8833595 | acquired hemolytic anemia |
| 8838203 | idiopathic hemolytic anemia |
| D609 | 8833581 | acquired pure red cell aplasia |
| D610 | 2840001 | Fanconi's anemia |
| 2840007 | congenital aplastic anemia |
| 8835971 | pure red cell aplasia |
| D611 | 8840706 | drug-induced hypoplastic anemia |
| D612 | 2859030 | radiation anemia |
| 8831483 | posthepatitic aplastic anemia |
| 8838399 | secondary hypoplastic anemia |
| D613 | 8838181 | idiopathic aplastic anemia |
| D619 | 2849003 | hypoplastic anemia |
| 2899005 | pancytopenia |
| 8833805 | myelosuppression |
| 8833811 | marrow hypoplasia |
| 8837870 | hypoplastic anemia |
| 8840110 | essential aplastic anemia |
| 8846120 | mild aplastic anemia |
| 8846136 | most severe aplastic anemia |
| 8846160 | severe aplastic anemia |
| D62- | 8832363 | acute blood loss anemia |
| 8835357 | postoperative anemia |
| D643 | 2850002 | sideroblastic anemia |
| D644 | 8836270 | congenital dyserythropoiesis anemia |
| D648 | 8834707 | symptomatic anemia |
| 8838925 | leukoerythroblastosis |
| D649 | 2819004 | normocytic anemia |
| 2819005 | normochromic anemia |
| 2859011 | anemia |
| 2859014 | senile anemia |
| 8835842 | normocytic normochromic anemia |
| 8840116 | primary anemia |
| P612 | 8840430 | anemia of prematurity |
| P614 | 7765003 | congenital anemia |
| **Infections** | A02 | 30001 | Salmonella gastroenteritis |
| 30002 | salmonellosis |
| 30003 | Salmonella enteritis |
| 30004 | Salmonella food poisoning |
| 8834040 | Salmonella infection |
| 8834043 | Salmonella osteomyelitis |
| 8834047 | Salmonella septicemia |
| A04 | 58003 | Escherichia coli food poisoning |
| 85003 | bacterial colitis |
| 85004 | bacterial enteritis |
| 85005 | bacterial gastroenteritis |
| 5580020 | pseudomembranous colitis |
| 8830120 | methicillin-resistant Staphylococcus aureus enterocolitis |
| 8831672 | campylobacter enterocolitis |
| 8832848 | Klebsiella enteritis |
| 8832854 | Clostridium perfringens enteritis |
| 8833937 | bacterial diarrhea |
| 8837369 | Escherichia coli enteritis |
| 8837683 | enterohemorrhagic Escherichia coli infection |
| 8837684 | enteroinvasive Escherichia coli infection |
| 8837686 | enterotoxigenic Escherichia coli infection |
| 8837760 | enterobacterial spondylitis |
| 8839554 | enteropathogenic Escherichia coli infection |
| 8842304 | Yersinia enterocolitis |
| 8844165 | pseudomembranous enteritis |
| 8847089 | Clostridium difficile enterocolitis |
| 8847268 | Pseudomonas aeruginosa enteritis |
| A08 | 88002 | viral gastroenteritis |
| 88003 | viral enteritis |
| 88004 | Rotavirus infection |
| 88005 | rotavirus enterocolitis |
| 88007 | epidemic diarrhea |
| 93016 | diarrhea with white stool |
| 788006 | epidemic vomiting |
| 8830271 | adenoviral enteritis |
| 8830750 | viral diarrhea |
| 8830928 | enterovirus enterocolitis |
| 8838431 | infantile winter diarrhea |
| 8842417 | norovirus gastroenteritis |
| 8842528 | norovirus enteritis |
| 8845854 | convulsion associated with viral gastroenteritis |
| 8847684 | rotavirus gastroenteritis |
| A31 | 8843760 | pulmonary nontuberculous mycobacteriosis |
| 8843768 | nontuberculous mycobacteriosis |
| 8843770 | skin nontuberculous mycobacteriosis |
| 8844808 | nontuberculous mycobacterial synovitis |
| 8844813 | nontuberculous mycobacterial spondylitis |
| 8844814 | nontuberculous mycobacterial skin ulcer |
| 8844815 | nontuberculous mycobacterial lymphadenitis |
| A39 | 8835782 | meningococcal infection |
| 8835786 | meningococcal conjunctivitis |
| 8835792 | meningococcal encephalitis |
| 8835794 | meningococcal sepsis |
| 8847764 | invasive meningococcal infection |
| A49 | 381003 | MRSA infection |
| 384002 | Gram-negative bacillus infection |
| 384003 | Gram-positive bacillus infection |
| 388002 | Gram-positive cocci infection |
| 389007 | opportunistic infection |
| 389014 | Transient bacteremia |
| 389015 | intermittent bacteremia |
| 389016 | persistent bacteremia |
| 410002 | hemolytic streptococcal infection |
| 411001 | staphylococcal infection |
| 7907001 | bacteremia |
| 8830711 | Haemophilus influenzae infection |
| 8830931 | Enterobacter infection |
| 8832847 | Klebsiella infection |
| 8832869 | Gram-negative bacteria infection |
| 8833216 | anaerobic infection |
| 8833934 | bacterial infection |
| 8836059 | serratia infection |
| 8837367 | Escherichia coli infection |
| 8839972 | Helicobacter pylori infection |
| 8840053 | Peptostreptococcus infection |
| 8841067 | Pseudomonas aeruginosa infection |
| 8841180 | streptococcal infection |
| 8841290 | group B hemolytic streptococcus infection |
| 8841338 | Proteus infection |
| 8842166 | mycoplasma infection |
| 8845583 | multidrug-resistant enterococcal infection |
| 8845587 | enterococcal infection |
| 8845601 | vancomycin resistant enterococcal infection |
| 8847067 | BLNAR infection |
| 8847068 | ESBL-producing bacterial infection |
| 8847069 | MRCNS infection |
| 8847111 | multidrug-resistant Acinetobacter infection |
| 8847113 | multidrug-resistant pseudomonas aeruginosa infection |
| 8847138 | penicillin-resistant streptococcus pneumonia infection |
| 8847765 | invasive pneumococcal infection |
| 8847809 | pneumococcal infection |
| A54 | 980002 | acute gonococcal urethritis |
| 980006 | gonococcal vulvitis |
| 980008 | gonococcal urethritis |
| 980013 | gonorrhea |
| 980016 | gonorrheal balanitis |
| 981002 | gonorrhea of cervix |
| 981003 | gonococcal prostatitis |
| 981004 | gonococcal salpingitis |
| 981006 | gonococcal cystitis |
| 981008 | gonococcal orchitis |
| 982001 | chronic gonococcal urethritis |
| 984005 | gonococcal conjunctivitis |
| 985003 | gonococcal arthritis |
| 8841071 | gonococcal pharyngitis |
| 8841073 | gonococcal vulval vaginitis |
| 8841080 | gonococcal pelviperitonitis |
| 8841082 | gonococcal epididymitis |
| 8841083 | gonococcal vaginitis |
| 8841085 | gonococcal pneumonia |
| 8841088 | gonococcal peritonitis |
| 8843634 | gonococcal stomatitis |
| A60 | 541002 | herpes genitalis |
| 541005 | vulval herpes |
| 541010 | genital herpes |
| 541011 | penile herpes |
| 8830707 | scrotal herpes |
| 8833710 | anal herpes |
| 8837793 | rectal herpes |
| 8839977 | herpesviral vulval vaginitis |
| A69 | 1010009 | Vincent bronchitis |
| 1010010 | Vincent tonsillitis |
| 8835749 | Spirochaetales infection |
| 8840873 | Lyme disease |
| 8840874 | Lyme disease arthritis |
| A70 | 8830987 | psittacosis |
| 8830988 | psittacosis pneumonia |
| A81 | 461004 | Creutzfeldt-Jakob disease |
| 463001 | progressive multifocal leukoencephalopathy |
| 8841662 | fatal familial insomnia |
| 8846131 | sporadic Creutzfeldt-Jakob disease |
| 8848413 | prion disease |
| B00 | 539017 | disseminated herpesviral disease |
| 542002 | oral herpes |
| 542010 | herpetic stomatitis |
| 543002 | herpes encephalitis |
| 544001 | herpetic keratitis |
| 544007 | disciform keratitis |
| 544012 | dendritic keratitis |
| 544014 | dendritic corneal ulcer |
| 547001 | ear herpes |
| 549002 | herpesvirus infection |
| 549005 | herpes of angle of the mouth |
| 549007 | herpes labialis |
| 549011 | recurrent herpes simplex |
| 549014 | herpes simplex |
| 549018 | subnasal herpes |
| 549023 | lip herpes simplex |
| 3621046 | acute retinal necrosis |
| 3643026 | Kirisawa type uveitis |
| 8831449 | Kaposi varicelliform disease |
| 8831450 | Kaposi dermatitis |
| 8832065 | ocular herpes simplex |
| 8832126 | facial herpes |
| 8832623 | thorax herpes |
| 8833015 | neck herpes |
| 8833317 | primary herpesviral stomatitis |
| 8833972 | recurrent herpesviral stomatitis |
| 8834751 | vesicular dermatitis |
| 8839973 | herpesviral meningitis |
| 8839974 | herpesviral pharyngitis |
| 8839975 | herpesviral keratoconjunctivitis |
| 8839976 | herpesviral hepatitis |
| 8839978 | herpesviral otitis externa |
| 8839979 | herpesviral iritis |
| 8839980 | herpesviral iridocyclitis |
| 8839981 | herpesviral eczema |
| 8839982 | herpesviral gingival stomatitis |
| 8839983 | herpesviral meningoencephalitis |
| 8839984 | herpesviral uveitis |
| 8839986 | herpesviral sepsis |
| 8839987 | herpesviral felon |
| 8839988 | herpesviral retinochoroiditis |
| 8839989 | herpesviral myelitis |
| 8839990 | herpesviral encephalomyelitis |
| 8844949 | eyelid herpes simplex |
| B08 | 570002 | erythema infectiosum |
| 740002 | aphthous pharyngitis |
| 740003 | Coxsackie virus pharyngitis |
| 740004 | herpangina |
| 743002 | hand-foot-and-mouth disease |
| 780002 | molluscum contagiosum |
| 780004 | molluscum contagiosum |
| 8838208 | exanthema subitum |
| B09 | 579001 | viral intoxication dermatosis |
| 8830757 | viral enanthema |
| 8830760 | viral dermatitis |
| 8830762 | viral eruption |
| 8839114 | roseola |
| B34 | 790001 | Adenovirus infection |
| 791001 | echovirus infection |
| 792001 | Coxsackie virus infection |
| 798001 | enterovirus infection |
| 799001 | viral infection |
| 799008 | respiratory syncytial virus infections |
| 3640001 | viral uveitis |
| 3702002 | viral superficial keratitis |
| 8830745 | viremia |
| 8830748 | viral arthritis |
| 8830759 | viral blood poisoning |
| 8839169 | Parvovirus infection |
| 8845474 | parainfluenza virus infection |
| 8847901 | human metapneumovirus infection |
| B66 | 1211001 | clonorchiasis |
| 1212004 | paragonimiasis |
| 1214001 | metagonimiasis |
| 1219002 | trematodiasis |
| J06 | 4650002 | pharyngolaryngitis |
| 4659007 | acute infection of upper respiratory tract |
| 8830654 | pharyngotracheitis |
| 8830672 | pharyngotonsillitis |
| 8832281 | acute pharyngolaryngitis |
| 8832282 | acute pharyngotonsillitis |
| 8832339 | acute palatal tonsillitis |
| 8841193 | streptococcal upper respiratory infection |
| J22 | 8832349 | acute respiratory infection |
| L08 | 6860021 | chronic pyodermia |
| 6869044 | cutaneous infection |
| 6869050 | periomphalitis |
| 6869054 | neck pustule |
| 6949002 | pustule |
| 8833459 | erythrasma |
| 8834818 | small pustular dermatitis |
| 8837062 | multiple pustulosis |
| 8838755 | pyoderma |
| 8838824 | septic dermatitis |
| 8845530 | acute generalized exanthematous pustulosis |
| O23 | 8834249 | intrauterine infection |
| 8838609 | intrauterine infection in pregnancy |
| 8838612 | renal infection in pregnancy |
| 8838613 | genital infection in pregnancy |
| 8838623 | urogenital infection in pregnancy |
| 8844092 | cervicitis in pregnancy |
| O86 | 6729001 | puerperal fever |
| 8830832 | perineal stitch abscess |
| 8830835 | infection after perineal laceration repair |
| 8834056 | infection of obstetric operative wound |
| 8834084 | puerperal infection |
| 8837857 | caesarean section site infection |
| 8839875 | postpartum urinary tract infection |
| O91 | 8834089 | puerperal purulent mastitis |
| 8834090 | puerperal stromal mastitis |
| 8834095 | puerperal parenchymatous mastitis |
| 8834097 | puerperal mastitis |
| 8834099 | puerperal nipple abscess |
| 8834100 | puerperal breast abscess |
| 8837856 | mastitis after cesarean section |
| 8838589 | gestational breast abscess |
| P39 | 7716001 | ophthalmia neonatorum |
| 7716002 | neonatal conjunctivitis |
| 8835018 | neonatal chlamydial conjunctivitis |
| 8835056 | neonatal urinary tract infection |
| 8836913 | fetal amniotic infection |
| 8848203 | neonatal infection |

Abbreviation: ICD-10, 10th revision of the International Statistical Classification of Diseases; CVD, Cardiovascular disease; T2DM, Type 2 diabetes mellitus.
